# Supplementary material for: Structural revision of glabramycins B and C, antibiotics from the fungus Neosartorya glabra by DFT calculations of NMR chemical shifts and coupling constants
Source: Royal Society of Chemistry journal article supplement (doi:10.1039/c5ra01753j), 2015-01-01
Supplement: c5ra01753j1.pdf [file c5ra01753j1.pdf]

Supporting Online Material for

Structural revision of glabramycins B and C,  
antibiotics from the fungus *Neosartorya glabra* by  
DFT calculations of NMR chemical shifts and  
coupling constants

*Yang Li* <sup>\*1</sup>

Department of Chemistry, Yale University, 225 Prospect Street, P.O. Box 208107, New Haven, CT 06520.

## Table of Contents

|                                                                         |     |
|-------------------------------------------------------------------------|-----|
| A. Cartesian coordinates for geometry-optimized structures              | S2  |
| B. Calculation of <sup>13</sup> C chemical shifts                       | S11 |
| C. Sample Gaussian input file for the calculation of coupling constants | S15 |

---

<sup>1</sup> Author's present address: Georgetown University Law Center, 600 New Jersey Ave NW, Washington, DC 20001.  
Tel: (202) 643-2539. Email: yl625@georgetown.edu

## A. Cartesian coordinates for geometry-optimized structures

Glabramycin C (11*R*,20*R*) isomer

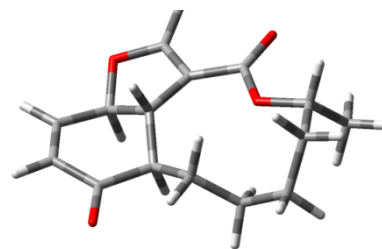

(conjugated olefin sidechain not shown)

Gaussian keywords:

```
# opt b3lyp/6-31g(d,p) scrf=(iefpcm,solvent=chloroform)
```

E = -1304.13968559 Hartree

| Atom | Coordinates (Å) |           |           |
|------|-----------------|-----------|-----------|
|      | X               | Y         | Z         |
| C    | 1.595216        | 3.589531  | -0.081386 |
| C    | 2.904341        | 3.857146  | -0.200035 |
| C    | 3.951634        | 2.828576  | 0.030075  |
| C    | 3.542793        | 1.344526  | 0.287841  |
| C    | 2.110598        | 1.139125  | -0.278333 |
| C    | 1.209280        | 2.214633  | 0.335920  |
| C    | 4.656172        | 0.392431  | -0.220812 |
| O    | 2.761134        | -1.689791 | -0.305388 |
| C    | 1.435570        | -1.491180 | -0.236258 |
| C    | 1.155832        | -0.056705 | -0.115466 |
| C    | 5.072482        | -0.684701 | 0.802305  |
| C    | 5.669423        | -1.975229 | 0.203764  |
| C    | 4.794893        | -2.756904 | -0.805009 |
| C    | 3.342537        | -3.020444 | -0.390164 |
| O    | 5.128533        | 3.165963  | 0.039244  |
| O    | 0.611589        | -2.398593 | -0.264540 |
| O    | -0.137303       | 1.830994  | -0.012061 |
| C    | -0.115596       | 0.462105  | -0.069583 |
| C    | -1.393234       | -0.203487 | -0.091490 |
| C    | -2.576964       | 0.456952  | -0.011650 |
| C    | -3.850944       | -0.208167 | -0.042286 |
| C    | -5.042663       | 0.441468  | 0.034468  |
| C    | -6.311374       | -0.235607 | 0.005279  |
| C    | -7.510024       | 0.385758  | 0.075971  |
| C    | -8.761184       | -0.385568 | 0.038586  |
| O    | -8.855956       | -1.599108 | -0.052212 |

| Atom | Coordinates (Å) |           |           |
|------|-----------------|-----------|-----------|
|      | X               | Y         | Z         |
| O    | -9.848536       | 0.421615  | 0.118375  |
| C    | 3.176267        | -3.785006 | 0.920355  |
| H    | 0.828841        | 4.347880  | -0.216270 |
| H    | 3.271932        | 4.849292  | -0.442568 |
| H    | 3.488337        | 1.271101  | 1.386799  |
| H    | 2.183815        | 1.333543  | -1.361579 |
| H    | 1.273296        | 2.137068  | 1.435597  |
| H    | 4.314069        | -0.069880 | -1.148408 |
| H    | 5.531662        | 0.998123  | -0.466958 |
| H    | 5.816187        | -0.252580 | 1.485006  |
| H    | 4.212707        | -0.947512 | 1.423871  |
| H    | 5.937330        | -2.638009 | 1.035975  |
| H    | 6.615454        | -1.739724 | -0.301127 |
| H    | 4.769539        | -2.228984 | -1.764993 |
| H    | 5.270095        | -3.725063 | -1.004254 |
| H    | 2.820044        | -3.558067 | -1.189228 |
| H    | -1.352942       | -1.282690 | -0.180132 |
| H    | -2.577306       | 1.540545  | 0.080199  |
| H    | -3.845699       | -1.293822 | -0.131475 |
| H    | -5.052490       | 1.527009  | 0.121973  |
| H    | -6.305908       | -1.321118 | -0.079334 |
| H    | -7.589755       | 1.464932  | 0.161125  |
| H    | -10.628294      | -0.158432 | 0.086676  |
| H    | 2.118702        | -3.938095 | 1.141175  |
| H    | 3.655864        | -4.765089 | 0.831076  |
| H    | 3.638500        | -3.254592 | 1.756961  |

Glabramycin C (1*R*,20*S*) isomer

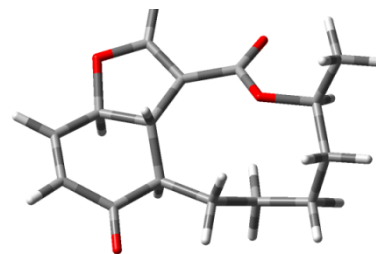

(conjugated olefin sidechain not shown)

Gaussian keywords:

# opt b3lyp/6-31g(d,p) scrf=(iefpcm,solvent=chloroform)

E = -1304.14555555 Hartree

| Atom | Coordinates (Å) |           |           |
|------|-----------------|-----------|-----------|
|      | X               | Y         | Z         |
| C    | 1.707017        | 3.580085  | -0.474492 |
| C    | 3.029220        | 3.793636  | -0.575358 |
| C    | 4.040501        | 2.792950  | -0.135332 |
| C    | 3.554727        | 1.418238  | 0.410699  |
| C    | 2.181070        | 1.134333  | -0.251611 |
| C    | 1.265105        | 2.298392  | 0.141916  |
| C    | 4.648850        | 0.345330  | 0.273540  |
| O    | 2.689081        | -1.722925 | -0.509508 |
| C    | 1.492230        | -1.453768 | 0.054278  |
| C    | 1.216546        | -0.014829 | 0.034140  |
| C    | 4.590462        | -0.726408 | 1.377500  |
| C    | 5.289013        | -2.055617 | 1.035788  |
| C    | 4.791405        | -2.805228 | -0.218046 |
| C    | 3.282694        | -3.041264 | -0.300213 |
| O    | 5.230141        | 3.076609  | -0.183885 |
| O    | 0.756143        | -2.316260 | 0.517849  |
| O    | -0.072816       | 1.867269  | -0.181221 |
| C    | -0.053280       | 0.505750  | -0.017556 |
| C    | -1.327744       | -0.164090 | 0.025191  |
| C    | -2.515388       | 0.492225  | -0.012460 |
| C    | -3.787407       | -0.176199 | 0.028989  |
| C    | -4.980593       | 0.474619  | 0.005060  |
| C    | -6.248757       | -0.202617 | 0.051763  |
| C    | -7.447685       | 0.421928  | 0.035601  |
| C    | -8.699036       | -0.348294 | 0.088200  |
| O    | -8.793908       | -1.563817 | 0.146047  |

| Atom | Coordinates (Å) |           |           |
|------|-----------------|-----------|-----------|
|      | X               | Y         | Z         |
| O    | -9.786180       | 0.462670  | 0.063846  |
| C    | 2.868874        | -3.963943 | -1.440329 |
| H    | 0.972092        | 4.324487  | -0.768201 |
| H    | 3.433972        | 4.721897  | -0.966405 |
| H    | 3.378753        | 1.597447  | 1.485685  |
| H    | 2.346488        | 1.164025  | -1.341030 |
| H    | 1.288637        | 2.400441  | 1.240740  |
| H    | 4.564232        | -0.109643 | -0.716406 |
| H    | 5.618532        | 0.849795  | 0.307805  |
| H    | 5.056246        | -0.319930 | 2.285132  |
| H    | 3.551265        | -0.928817 | 1.653054  |
| H    | 5.191881        | -2.721527 | 1.903257  |
| H    | 6.365491        | -1.878334 | 0.912472  |
| H    | 5.101101        | -2.282099 | -1.130946 |
| H    | 5.284070        | -3.784553 | -0.250328 |
| H    | 2.893425        | -3.428019 | 0.647285  |
| H    | -1.284835       | -1.244361 | 0.106176  |
| H    | -2.519713       | 1.578105  | -0.071533 |
| H    | -3.779336       | -1.264047 | 0.085079  |
| H    | -4.992264       | 1.562273  | -0.050040 |
| H    | -6.242566       | -1.290121 | 0.104663  |
| H    | -7.527491       | 1.503265  | -0.015275 |
| H    | -10.566217      | -0.116655 | 0.101261  |
| H    | 1.781344        | -4.062611 | -1.472644 |
| H    | 3.301402        | -4.958982 | -1.297057 |
| H    | 3.216865        | -3.571782 | -2.401375 |

Glabramycin C (1*S*,20*R*) isomer

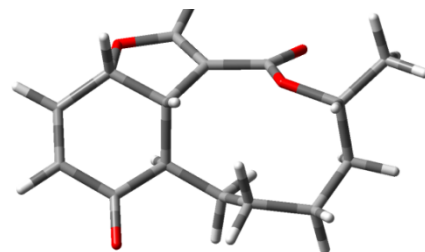

(conjugated olefin sidechain not shown)

Gaussian keywords:

# opt b3lyp/6-31g(d,p) scrf=(iefpcm,solvent=chloroform)

E = -1304.14931241 Hartree

| Atom | Coordinates (Å) |           |           |
|------|-----------------|-----------|-----------|
|      | X               | Y         | Z         |
| C    | -1.741910       | -3.552366 | -0.888752 |
| C    | -2.801218       | -3.846531 | -0.121226 |
| C    | -3.590336       | -2.796072 | 0.575635  |
| C    | -2.902138       | -1.440687 | 0.684360  |
| C    | -2.302346       | -1.044580 | -0.701462 |
| C    | -1.381802       | -2.143009 | -1.252598 |
| C    | -3.725353       | -0.352103 | 1.391674  |
| O    | -2.910076       | 1.712448  | -0.941913 |
| C    | -1.673572       | 1.506142  | -0.427196 |
| C    | -1.310567       | 0.094553  | -0.582022 |
| C    | -4.937791       | 0.220947  | 0.634278  |
| C    | -5.306606       | 1.655337  | 1.063574  |
| C    | -4.242925       | 2.752315  | 0.836226  |
| C    | -3.726319       | 2.880911  | -0.602711 |
| O    | -4.670043       | -3.050257 | 1.092854  |
| O    | -0.974112       | 2.373781  | 0.079179  |
| O    | -0.043165       | -1.791820 | -0.756465 |
| C    | -0.053438       | -0.441326 | -0.535042 |
| C    | 1.211261        | 0.205499  | -0.298022 |
| C    | 2.403472        | -0.442664 | -0.327333 |
| C    | 3.659645        | 0.208802  | -0.074577 |
| C    | 4.859470        | -0.429712 | -0.098648 |
| C    | 6.108906        | 0.236276  | 0.154915  |
| C    | 7.316273        | -0.371950 | 0.140565  |
| C    | 8.545420        | 0.387746  | 0.412295  |
| O    | 8.613913        | 1.580075  | 0.664445  |

| Atom | Coordinates (Å) |           |           |
|------|-----------------|-----------|-----------|
|      | X               | Y         | Z         |
| O    | 9.645587        | -0.403802 | 0.352998  |
| C    | -3.046440       | 4.212150  | -0.913683 |
| H    | -1.151076       | -4.343137 | -1.344788 |
| H    | -3.119166       | -4.872728 | 0.040717  |
| H    | -2.033924       | -1.646572 | 1.330033  |
| H    | -3.105003       | -0.836032 | -1.411402 |
| H    | -1.321795       | -2.061680 | -2.346877 |
| H    | -4.060957       | -0.759814 | 2.351421  |
| H    | -3.027947       | 0.453621  | 1.642444  |
| H    | -4.753556       | 0.215353  | -0.443246 |
| H    | -5.802602       | -0.430442 | 0.799042  |
| H    | -5.567917       | 1.657908  | 2.130119  |
| H    | -6.220718       | 1.947249  | 0.529846  |
| H    | -3.383137       | 2.623818  | 1.503367  |
| H    | -4.688797       | 3.715780  | 1.112205  |
| H    | -4.568147       | 2.756818  | -1.292679 |
| H    | 1.151618        | 1.265414  | -0.074524 |
| H    | 2.423188        | -1.507215 | -0.549043 |
| H    | 3.633550        | 1.275042  | 0.147264  |
| H    | 4.890648        | -1.495945 | -0.318425 |
| H    | 6.079440        | 1.302573  | 0.373381  |
| H    | 7.419558        | -1.431938 | -0.069290 |
| H    | 10.409215       | 0.167267  | 0.543142  |
| H    | -2.268996       | 4.451719  | -0.188860 |
| H    | -2.597250       | 4.187939  | -1.910737 |
| H    | -3.803194       | 5.003512  | -0.903392 |

Glabramycin C (1*S*,20*S*) isomer

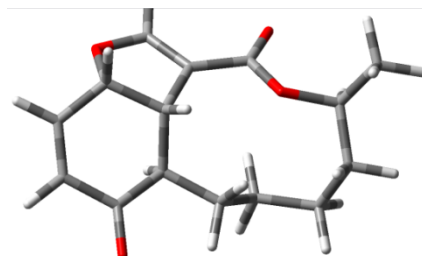

(conjugated olefin sidechain not shown)

Gaussian keywords:

```
# opt b3lyp/6-31g(d,p) scrf=(iefpcm,solvent=chloroform)
```

E = -1304.15513839 Hartree

| Atom | Coordinates (Å) |           |           |
|------|-----------------|-----------|-----------|
|      | X               | Y         | Z         |
| C    | 1.607475        | 3.580868  | -0.855545 |
| C    | 2.662649        | 3.920352  | -0.106804 |
| C    | 3.583232        | 2.916925  | 0.474288  |
| C    | 3.090802        | 1.461107  | 0.536556  |
| C    | 2.306272        | 1.079107  | -0.764951 |
| C    | 1.331473        | 2.169675  | -1.262212 |
| C    | 4.239354        | 0.491343  | 0.887641  |
| O    | 2.973624        | -1.698633 | -0.733758 |
| C    | 1.656891        | -1.492995 | -0.493878 |
| C    | 1.321551        | -0.076297 | -0.613249 |
| C    | 3.846519        | -0.660089 | 1.833872  |
| C    | 4.760760        | -1.898365 | 1.754735  |
| C    | 4.886885        | -2.595149 | 0.382736  |
| C    | 3.569882        | -2.960587 | -0.304893 |
| O    | 4.649103        | 3.276819  | 0.957390  |
| O    | 0.880292        | -2.396458 | -0.204282 |
| O    | 0.008139        | 1.777778  | -0.768664 |
| C    | 0.050696        | 0.432713  | -0.561694 |
| C    | -1.205117       | -0.233632 | -0.322897 |
| C    | -2.401196       | 0.408205  | -0.335549 |
| C    | -3.652586       | -0.253588 | -0.085308 |
| C    | -4.854368       | 0.381509  | -0.092799 |
| C    | -6.101268       | -0.290548 | 0.157843  |
| C    | -7.308889       | 0.317090  | 0.159298  |
| C    | -8.536576       | -0.446906 | 0.426563  |
| O    | -8.603251       | -1.642725 | 0.661607  |

| Atom | Coordinates (Å) |           |           |
|------|-----------------|-----------|-----------|
|      | X               | Y         | Z         |
| O    | -9.637031       | 0.345053  | 0.383548  |
| C    | 3.742685        | -3.857193 | -1.524784 |
| H    | 0.933709        | 4.339749  | -1.246259 |
| H    | 2.899262        | 4.958579  | 0.107742  |
| H    | 2.364387        | 1.476301  | 1.364970  |
| H    | 3.044613        | 0.877891  | -1.547008 |
| H    | 1.264600        | 2.118665  | -2.357886 |
| H    | 4.645930        | 0.094636  | -0.046496 |
| H    | 5.040356        | 1.074483  | 1.350138  |
| H    | 3.866733        | -0.289298 | 2.867038  |
| H    | 2.810360        | -0.965798 | 1.663569  |
| H    | 4.399894        | -2.632217 | 2.487119  |
| H    | 5.771789        | -1.620904 | 2.080808  |
| H    | 5.458517        | -3.520854 | 0.522147  |
| H    | 5.472542        | -1.981840 | -0.312723 |
| H    | 2.876657        | -3.428008 | 0.400571  |
| H    | -1.134819       | -1.296474 | -0.122392 |
| H    | -2.429542       | 1.475602  | -0.542012 |
| H    | -3.620858       | -1.322908 | 0.120029  |
| H    | -4.889366       | 1.450871  | -0.296275 |
| H    | -6.069369       | -1.359963 | 0.359953  |
| H    | -7.413593       | 1.380047  | -0.034254 |
| H    | -10.399784      | -0.228784 | 0.568939  |
| H    | 4.177720        | -4.817426 | -1.230792 |
| H    | 2.775546        | -4.048732 | -1.996919 |
| H    | 4.404967        | -3.389563 | -2.260557 |

Glabramycin B (1*R*,20*R*) isomer

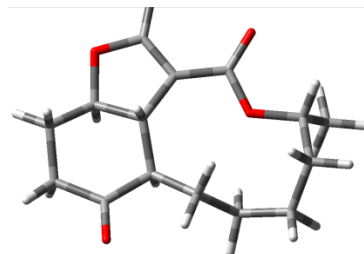

(conjugated olefin sidechain not shown)

Gaussian keywords:

```
# opt b3lyp/6-31g(d,p) scrf=(iefpcm,solvent=methanol)
```

E = -1305.37683163 Hartree

| Atom | Coordinates (Å) |           |           |
|------|-----------------|-----------|-----------|
|      | X               | Y         | Z         |
| C    | 1.542080        | 3.597615  | -0.172234 |
| C    | 2.967721        | 3.867359  | 0.341818  |
| C    | 3.971282        | 2.748007  | 0.064825  |
| C    | 3.529890        | 1.262934  | 0.243194  |
| C    | 2.084508        | 1.115232  | -0.319113 |
| C    | 1.186817        | 2.203416  | 0.281242  |
| C    | 4.601631        | 0.303312  | -0.334467 |
| O    | 2.724434        | -1.742350 | -0.154831 |
| C    | 1.402435        | -1.521267 | -0.207660 |
| C    | 1.128435        | -0.082969 | -0.142987 |
| C    | 5.131936        | -0.727190 | 0.685586  |
| C    | 5.664233        | -2.047084 | 0.089393  |
| C    | 4.699307        | -2.855582 | -0.808615 |
| C    | 3.281177        | -3.080661 | -0.271138 |
| O    | -0.162968       | 1.801448  | -0.056665 |
| C    | -0.142699       | 0.437004  | -0.101402 |
| C    | -1.422260       | -0.228001 | -0.108571 |
| C    | -2.604188       | 0.436518  | -0.034831 |
| C    | -3.879803       | -0.226338 | -0.052459 |
| C    | -5.069752       | 0.427906  | 0.016483  |
| C    | -6.339008       | -0.248312 | -0.000581 |
| C    | -7.537485       | 0.375237  | 0.062173  |
| C    | -8.789726       | -0.393397 | 0.038057  |
| O    | -8.887307       | -1.609293 | -0.034722 |
| O    | -9.874675       | 0.416033  | 0.107334  |
| O    | 5.119545        | 3.038593  | -0.224866 |
| H    | 2.162001        | 1.290999  | -1.406085 |

| Atom | Coordinates (Å) |           |           |
|------|-----------------|-----------|-----------|
|      | X               | Y         | Z         |
| H    | 3.477707        | 1.134111  | 1.336484  |
| O    | 0.573080        | -2.423500 | -0.285116 |
| C    | 3.197411        | -3.811459 | 1.065421  |
| H    | 1.502352        | 3.660908  | -1.265247 |
| H    | 0.846856        | 4.338946  | 0.232806  |
| H    | 2.935920        | 3.985464  | 1.434821  |
| H    | 3.383075        | 4.791146  | -0.066036 |
| H    | 1.255602        | 2.146339  | 1.379651  |
| H    | 4.179644        | -0.202357 | -1.203485 |
| H    | 5.436993        | 0.907650  | -0.696371 |
| H    | 5.942636        | -0.267855 | 1.266973  |
| H    | 4.343795        | -0.961341 | 1.406025  |
| H    | 5.997506        | -2.679574 | 0.921730  |
| H    | 6.564815        | -1.843902 | -0.504894 |
| H    | 4.602597        | -2.367012 | -1.784764 |
| H    | 5.144243        | -3.838530 | -1.005617 |
| H    | 2.686543        | -3.621514 | -1.014715 |
| H    | -1.386975       | -1.308154 | -0.183913 |
| H    | -2.602314       | 1.521312  | 0.040322  |
| H    | -3.877656       | -1.313262 | -0.124979 |
| H    | -5.077343       | 1.514505  | 0.087342  |
| H    | -6.332644       | -1.334982 | -0.068814 |
| H    | -7.614826       | 1.455675  | 0.131091  |
| H    | -10.658553      | -0.159299 | 0.085627  |
| H    | 2.155074        | -3.915925 | 1.374785  |
| H    | 3.627679        | -4.812887 | 0.963915  |
| H    | 3.744747        | -3.281587 | 1.849462  |

Glabramycin B (1*R*,20*S*) isomer

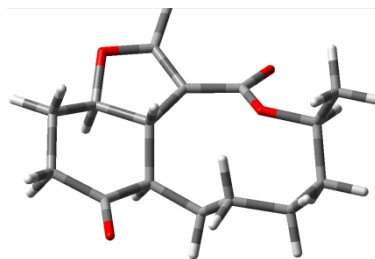

(conjugated olefin sidechain not shown)

Gaussian keywords:

```
# opt b3lyp/6-31g(d,p) scrf=(iefpcm,solvent=methanol)
```

E = -1305.37987451 Hartree

| Atom | Coordinates (Å) |           |           |
|------|-----------------|-----------|-----------|
|      | X               | Y         | Z         |
| C    | -1.701764       | 3.420867  | 0.743064  |
| C    | -3.128831       | 3.767946  | 0.255945  |
| C    | -4.054871       | 2.582632  | -0.057437 |
| C    | -3.439574       | 1.327039  | -0.710886 |
| C    | -2.126622       | 1.028282  | 0.064364  |
| C    | -1.225669       | 2.261114  | -0.102068 |
| C    | -4.456392       | 0.192140  | -0.922069 |
| O    | -2.544623       | -1.783593 | 0.252786  |
| C    | -1.397180       | -1.501222 | -0.397480 |
| C    | -1.129257       | -0.061682 | -0.303534 |
| C    | -5.036664       | -0.483717 | 0.335671  |
| C    | -5.520800       | -1.932881 | 0.102603  |
| C    | -4.517154       | -2.922253 | -0.530493 |
| C    | -3.163853       | -3.100289 | 0.171992  |
| O    | 0.119416        | 1.795946  | 0.170179  |
| C    | 0.127030        | 0.467895  | -0.156164 |
| C    | 1.409933        | -0.184482 | -0.235901 |
| C    | 2.589209        | 0.463424  | -0.058162 |
| C    | 3.867576        | -0.190250 | -0.133373 |
| C    | 5.052544        | 0.451675  | 0.046167  |
| C    | 6.325381        | -0.213523 | -0.031183 |
| C    | 7.518748        | 0.398606  | 0.142977  |
| C    | 8.775090        | -0.357419 | 0.046447  |
| O    | 8.880466        | -1.552495 | -0.185922 |
| O    | 9.854012        | 0.437456  | 0.249678  |
| O    | -5.253839       | 2.677639  | 0.144494  |
| H    | -2.383416       | 0.904526  | 1.128987  |

| Atom | Coordinates (Å) |           |           |
|------|-----------------|-----------|-----------|
|      | X               | Y         | Z         |
| H    | -3.135526       | 1.659726  | -1.716809 |
| O    | -0.691379       | -2.339644 | -0.944020 |
| C    | -3.241948       | -3.661061 | 1.586904  |
| H    | -1.713713       | 3.131444  | 1.799294  |
| H    | -1.050183       | 4.293686  | 0.641088  |
| H    | -3.052754       | 4.327074  | -0.688102 |
| H    | -3.649339       | 4.417656  | 0.962794  |
| H    | -1.226310       | 2.556594  | -1.162368 |
| H    | -5.277121       | 0.597163  | -1.525001 |
| H    | -3.960360       | -0.550682 | -1.551182 |
| H    | -4.294096       | -0.483432 | 1.136418  |
| H    | -5.882652       | 0.107407  | 0.701243  |
| H    | -6.402887       | -1.915198 | -0.551341 |
| H    | -5.872904       | -2.334276 | 1.060987  |
| H    | -4.989568       | -3.911263 | -0.582417 |
| H    | -4.317718       | -2.636129 | -1.569355 |
| H    | -2.516300       | -3.732657 | -0.441060 |
| H    | 1.381918        | -1.245399 | -0.459804 |
| H    | 2.581583        | 1.530522  | 0.151079  |
| H    | 3.871770        | -1.258623 | -0.346136 |
| H    | 5.053114        | 1.519480  | 0.259659  |
| H    | 6.326479        | -1.281257 | -0.244453 |
| H    | 7.588678        | 1.460198  | 0.357967  |
| H    | 10.641084       | -0.128362 | 0.170698  |
| H    | -2.240141       | -3.769340 | 2.011894  |
| H    | -3.715543       | -4.647473 | 1.569806  |
| H    | -3.826094       | -3.010904 | 2.244234  |

Glabramycin B (1*S*,20*R*) isomer

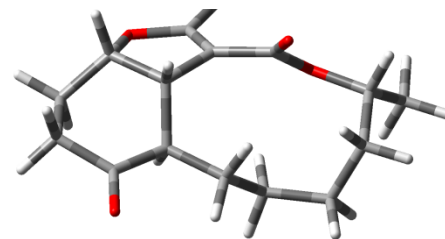

(conjugated olefin sidechain not shown)

Gaussian keywords:

```
# opt b3lyp/6-31g(d,p) scrf=(iefpcm,solvent=methanol)
```

E = -1305.38013316 Hartree

| Atom | Coordinates (Å) |           |           |
|------|-----------------|-----------|-----------|
|      | X               | Y         | Z         |
| C    | 2.154489        | -3.597423 | -0.206503 |
| C    | 3.687047        | -3.669032 | -0.258419 |
| C    | 4.341313        | -2.336053 | -0.618005 |
| C    | 3.424767        | -1.115370 | -0.531149 |
| C    | 2.586927        | -1.250137 | 0.785994  |
| C    | 1.707670        | -2.524659 | 0.786992  |
| C    | 4.136200        | 0.239760  | -0.722098 |
| O    | 1.353160        | 2.133158  | 0.490162  |
| C    | 1.906513        | 1.201732  | 1.293423  |
| C    | 1.532195        | -0.175791 | 0.930930  |
| C    | 3.331603        | 1.217941  | -1.612352 |
| C    | 3.673860        | 2.714440  | -1.458424 |
| C    | 3.432078        | 3.365285  | -0.078459 |
| C    | 1.987337        | 3.457421  | 0.450555  |
| O    | 0.359748        | -2.064546 | 0.448180  |
| C    | 0.314339        | -0.711568 | 0.653513  |
| C    | -0.975007       | -0.070262 | 0.579526  |
| C    | -2.134599       | -0.736455 | 0.350521  |
| C    | -3.414007       | -0.086951 | 0.259670  |
| C    | -4.580821       | -0.745596 | 0.028540  |
| C    | -5.852201       | -0.079807 | -0.059835 |
| C    | -7.029780       | -0.704240 | -0.290953 |
| C    | -8.284046       | 0.056334  | -0.367005 |
| O    | -8.403007       | 1.265898  | -0.237806 |
| O    | -9.346057       | -0.752003 | -0.605905 |
| O    | 5.513684        | -2.276899 | -0.948907 |
| H    | 3.276193        | -1.250637 | 1.636616  |

| Atom | Coordinates (Å) |           |           |
|------|-----------------|-----------|-----------|
|      | X               | Y         | Z         |
| H    | 2.715893        | -1.250859 | -1.363702 |
| O    | 2.710518        | 1.456918  | 2.177644  |
| C    | 1.055335        | 4.321218  | -0.385260 |
| H    | 1.733487        | -4.569521 | 0.063797  |
| H    | 1.759617        | -3.345006 | -1.196125 |
| H    | 4.032456        | -4.422809 | -0.972137 |
| H    | 4.090320        | -3.968972 | 0.719120  |
| H    | 1.649612        | -2.934047 | 1.802125  |
| H    | 4.338634        | 0.676958  | 0.260661  |
| H    | 5.115183        | 0.054183  | -1.174606 |
| H    | 3.501381        | 0.939529  | -2.660622 |
| H    | 2.261188        | 1.082033  | -1.440668 |
| H    | 3.119878        | 3.269319  | -2.225766 |
| H    | 4.735588        | 2.862355  | -1.696688 |
| H    | 4.039366        | 2.865979  | 0.680347  |
| H    | 3.800166        | 4.398285  | -0.119821 |
| H    | 2.024364        | 3.832797  | 1.478069  |
| H    | -0.974141       | 1.008259  | 0.703338  |
| H    | -2.107248       | -1.816231 | 0.225345  |
| H    | -3.435321       | 0.995151  | 0.384806  |
| H    | -4.566305       | -1.827052 | -0.098127 |
| H    | -5.865921       | 1.001497  | 0.067724  |
| H    | -7.087465       | -1.779501 | -0.427431 |
| H    | -10.132681      | -0.181296 | -0.642849 |
| H    | 0.055415        | 4.345762  | 0.056589  |
| H    | 1.438173        | 5.344929  | -0.425955 |
| H    | 0.970537        | 3.943964  | -1.408191 |



Glabramycin B (1*S*,20*S*) isomer

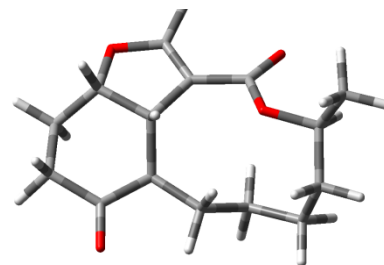

(conjugated olefin sidechain not shown)

Gaussian keywords:

```
# opt b3lyp/6-31g(d,p) scrf=(iefpcm,solvent=methanol)
```

E = -1305.38985208 Hartree

| Atom | Coordinates (Å) |           |           |
|------|-----------------|-----------|-----------|
|      | X               | Y         | Z         |
| C    | 1.564700        | 3.543985  | -0.197347 |
| C    | 3.053270        | 3.877014  | -0.255677 |
| C    | 3.930664        | 2.746725  | 0.263992  |
| C    | 3.249333        | 1.388540  | 0.526145  |
| C    | 2.266773        | 1.076235  | -0.662609 |
| C    | 1.299085        | 2.263399  | -0.976541 |
| C    | 4.301450        | 0.302231  | 0.815845  |
| O    | 2.831824        | -1.755226 | -0.734524 |
| C    | 1.550199        | -1.487286 | -0.392797 |
| C    | 1.262182        | -0.056888 | -0.468817 |
| C    | 3.859023        | -0.802445 | 1.792138  |
| C    | 4.675154        | -2.106093 | 1.685015  |
| C    | 4.734764        | -2.786009 | 0.300490  |
| C    | 3.386889        | -3.057891 | -0.370405 |
| O    | -0.045408       | 1.800008  | -0.649436 |
| C    | -0.005835       | 0.462594  | -0.443703 |
| C    | -1.273696       | -0.198903 | -0.245036 |
| C    | -2.463887       | 0.453213  | -0.271955 |
| C    | -3.724362       | -0.206522 | -0.062956 |
| C    | -4.922922       | 0.434691  | -0.083897 |
| C    | -6.175914       | -0.239375 | 0.127647  |
| C    | -7.383135       | 0.369864  | 0.114420  |
| C    | -8.616887       | -0.395919 | 0.341376  |
| O    | -8.690263       | -1.596850 | 0.554543  |
| O    | -9.714505       | 0.397354  | 0.288493  |
| O    | 5.118449        | 2.938061  | 0.466593  |
| H    | 2.892345        | 0.880247  | -1.540524 |

| Atom | Coordinates (Å) |           |           |
|------|-----------------|-----------|-----------|
|      | X               | Y         | Z         |
| H    | 2.636290        | 1.553225  | 1.427266  |
| O    | 0.756357        | -2.362351 | -0.057722 |
| C    | 3.491677        | -3.907390 | -1.630783 |
| H    | 0.963023        | 4.362258  | -0.602813 |
| H    | 1.249484        | 3.399110  | 0.841724  |
| H    | 3.293843        | 4.780873  | 0.312179  |
| H    | 3.365680        | 4.075881  | -1.290348 |
| H    | 1.299208        | 2.467850  | -2.052902 |
| H    | 4.606730        | -0.130705 | -0.139901 |
| H    | 5.188432        | 0.797504  | 1.220642  |
| H    | 3.954198        | -0.425321 | 2.818941  |
| H    | 2.796334        | -1.029097 | 1.672410  |
| H    | 4.269959        | -2.822679 | 2.411224  |
| H    | 5.708246        | -1.909653 | 2.000735  |
| H    | 5.350286        | -2.200834 | -0.393246 |
| H    | 5.245876        | -3.749618 | 0.416230  |
| H    | 2.691544        | -3.524290 | 0.332730  |
| H    | -1.219657       | -1.264977 | -0.060633 |
| H    | -2.481735       | 1.524711  | -0.456475 |
| H    | -3.702340       | -1.279866 | 0.121648  |
| H    | -4.950534       | 1.507703  | -0.267345 |
| H    | -6.148000       | -1.312300 | 0.310978  |
| H    | -7.481652       | 1.436233  | -0.062399 |
| H    | -10.484768      | -0.174893 | 0.446990  |
| H    | 2.506376        | -4.040063 | -2.085873 |
| H    | 3.893850        | -4.895686 | -1.388129 |
| H    | 4.154226        | -3.436217 | -2.36396  |

The energies of the eight structures calculated above are summarized below:

### Glabramycin C

|                             | Energy / Hartree | Relative Energy / Hartree | Relative Energy / kcal mol <sup>-1</sup> |
|-----------------------------|------------------|---------------------------|------------------------------------------|
| (11 <i>R</i> ,20 <i>R</i> ) | -1304.13968559   | 0.01545280                | 9.69678                                  |
| (11 <i>R</i> ,20 <i>S</i> ) | -1304.14555555   | 0.00958284                | 6.01332                                  |
| (11 <i>S</i> ,20 <i>R</i> ) | -1304.14931241   | 0.00582598                | 3.65586                                  |
| (11 <i>S</i> ,20 <i>S</i> ) | -1304.15513839   | 0.00000000                | 0.00000                                  |

### Glabramycin B

|                             | Energy / Hartree | Relative Energy / Hartree | Relative Energy / kcal mol <sup>-1</sup> |
|-----------------------------|------------------|---------------------------|------------------------------------------|
| (11 <i>R</i> ,20 <i>R</i> ) | -1305.37683163   | 0.01302045                | 8.17046                                  |
| (11 <i>R</i> ,20 <i>S</i> ) | -1305.37987451   | 0.00997757                | 6.26102                                  |
| (11 <i>S</i> ,20 <i>R</i> ) | -1305.38013316   | 0.00971892                | 6.09871                                  |
| (11 <i>S</i> ,20 <i>S</i> ) | -1305.38985208   | 0.00000000                | 0.00000                                  |

## B. Calculation of $^{13}\text{C}$ chemical shifts

### Glabramycin C

| Configuration               | $a$      | $b$     | $r^2$   |
|-----------------------------|----------|---------|---------|
| (11 <i>R</i> ,20 <i>R</i> ) | -4.29145 | 1.03285 | 0.99082 |
| (11 <i>R</i> ,20 <i>S</i> ) | -5.30962 | 1.03941 | 0.99275 |
| (11 <i>S</i> ,20 <i>R</i> ) | -2.20775 | 1.02481 | 0.99716 |
| (11 <i>S</i> ,20 <i>S</i> ) | -3.85632 | 1.03802 | 0.99768 |

**Table S1.** Scaling constants  $a$  and  $b$  determined by least-squares linear regression between the calculated chemical shifts  $\delta_{\text{calcd}}$  and the experimental ones  $\delta_{\text{exp}}$ , and correlation coefficient  $r^2$ . All carbon atoms were included in the linear regression calculation. The NMR peak assignments were unchanged from the original report.<sup>2</sup>

| Carbon Atom | Exp Shift | Predicted Chemical shift $\delta_{\text{scaled}}$ |                             |                             |                             |
|-------------|-----------|---------------------------------------------------|-----------------------------|-----------------------------|-----------------------------|
|             |           | (11 <i>R</i> ,20 <i>R</i> )                       | (11 <i>R</i> ,20 <i>S</i> ) | (11 <i>S</i> ,20 <i>R</i> ) | (11 <i>S</i> ,20 <i>S</i> ) |
| 1           | 170.8     | 163.1                                             | 163.2                       | 163.9                       | 164.4                       |
| 2           | 122.2     | 119.1                                             | 119.0                       | 120.1                       | 120.4                       |
| 3           | 145.5     | 145.1                                             | 145.0                       | 146.0                       | 146.2                       |
| 4           | 134.5     | 134.0                                             | 133.9                       | 134.8                       | 135.4                       |
| 5           | 140.0     | 140.3                                             | 139.9                       | 141.2                       | 141.3                       |
| 6           | 135.9     | 135.6                                             | 135.2                       | 136.1                       | 137.5                       |
| 7           | 122.9     | 123.5                                             | 122.4                       | 123.5                       | 124.3                       |
| 8           | 163.1     | 166.1                                             | 165.9                       | 162.9                       | 165.5                       |
| 9           | 112.0     | 112.8                                             | 112.9                       | 115.1                       | 113.0                       |
| 10          | 44.0      | 53.1                                              | 52.5                        | 44.8                        | 48.1                        |
| 11          | 77.5      | 81.9                                              | 82.4                        | 79.2                        | 77.7                        |
| 12          | 137.6     | 147.5                                             | 147.9                       | 138.3                       | 139.1                       |
| 13          | 132.5     | 126.3                                             | 126.4                       | 132.2                       | 130.9                       |
| 14          | 198.7     | 199.3                                             | 198.6                       | 199.7                       | 198.6                       |
| 15          | 48.3      | 56.5                                              | 56.0                        | 49.8                        | 49.8                        |
| 16          | 22.9      | 23.7                                              | 20.0                        | 19.4                        | 21.7                        |
| 17          | 23.6      | 27.7                                              | 23.5                        | 19.8                        | 25.0                        |
| 18          | 32.4      | 20.6                                              | 23.1                        | 27.2                        | 25.1                        |
| 19          | 24.8      | 26.7                                              | 27.3                        | 28.7                        | 28.6                        |
| 20          | 73.2      | 71.6                                              | 71.9                        | 80.3                        | 71.7                        |
| 22          | 164.9     | 160.2                                             | 163.2                       | 163.3                       | 164.2                       |
| 23          | 20.6      | 13.2                                              | 17.7                        | 21.4                        | 19.4                        |

**Table S2.** Experimental chemical shifts, and chemical shifts predicted for all of the suspected stereoisomers. Predicted shifts were scaled using the scaling constants in Table S1,  $\delta_{\text{scaled}} = a + b \cdot \delta_{\text{calcd}}$ . NMR peak assignments were unchanged from the original report.<sup>2</sup>  $\Delta\delta$  values derived from this table are plotted in Figure 2 in the main text.

<sup>2</sup> H. Jayasuriya, D. Zink, A. Basilio, F. Vicente, J. Collado, G. Bills, M. L. Goldman, M. Motyl, J. Huber and G. Dezeny, *J. Antibiot.*, 2009, **62**, 265-269.

Glabramycin C, with reassignments of C18 and C19

| Configuration               | <i>a</i> | <i>b</i> | <i>r</i> <sup>2</sup> |
|-----------------------------|----------|----------|-----------------------|
| (11 <i>R</i> ,20 <i>R</i> ) | -3.93163 | 1.02561  | 0.99258               |
| (11 <i>R</i> ,20 <i>S</i> ) | -4.92265 | 1.03194  | 0.99421               |
| (11 <i>S</i> ,20 <i>R</i> ) | -1.84625 | 1.01786  | 0.99812               |
| (11 <i>S</i> ,20 <i>S</i> ) | -3.52952 | 1.03166  | 0.99906               |

**Table S3.** Scaling constants *a* and *b* determined by least-squares linear regression between the calculated chemical shifts  $\delta_{\text{calcd}}$  and the experimental ones  $\delta_{\text{exp}}$ , and correlation coefficient *r*<sup>2</sup>. The carboxylate C1 atom was excluded from the linear regression calculation. The assignments for the C18 and C19 NMR peaks were exchanged.

| Carbon Atom | Exp Shift | Predicted Chemical shift $\delta_{\text{scaled}}$ |                             |                             |                             |
|-------------|-----------|---------------------------------------------------|-----------------------------|-----------------------------|-----------------------------|
|             |           | (11 <i>R</i> ,20 <i>R</i> )                       | (11 <i>R</i> ,20 <i>S</i> ) | (11 <i>S</i> ,20 <i>R</i> ) | (11 <i>S</i> ,20 <i>S</i> ) |
| 1           | 170.8     | 162.3                                             | 162.3                       | 163.2                       | 163.7                       |
| 2           | 122.2     | 118.6                                             | 118.5                       | 119.7                       | 120.0                       |
| 3           | 145.5     | 144.4                                             | 144.3                       | 145.4                       | 145.7                       |
| 4           | 134.5     | 133.4                                             | 133.3                       | 134.2                       | 134.9                       |
| 5           | 140.0     | 139.7                                             | 139.3                       | 140.6                       | 140.8                       |
| 6           | 135.9     | 135.0                                             | 134.5                       | 135.5                       | 136.9                       |
| 7           | 122.9     | 123.0                                             | 121.8                       | 123.0                       | 123.8                       |
| 8           | 163.1     | 165.3                                             | 165.1                       | 162.1                       | 164.8                       |
| 9           | 112.0     | 112.4                                             | 112.5                       | 114.6                       | 112.6                       |
| 10          | 44.0      | 53.1                                              | 52.5                        | 44.8                        | 48.1                        |
| 11          | 77.5      | 81.6                                              | 82.2                        | 79.0                        | 77.5                        |
| 12          | 137.6     | 146.8                                             | 147.2                       | 137.7                       | 138.5                       |
| 13          | 132.5     | 125.8                                             | 125.8                       | 131.7                       | 130.4                       |
| 14          | 198.7     | 198.3                                             | 197.5                       | 198.6                       | 197.7                       |
| 15          | 48.3      | 56.4                                              | 55.9                        | 49.8                        | 49.8                        |
| 16          | 22.9      | 23.9                                              | 20.2                        | 19.6                        | 21.8                        |
| 17          | 23.6      | 27.8                                              | 23.7                        | 20.0                        | 25.2                        |
| 18          | 24.8      | 20.8                                              | 23.3                        | 27.4                        | 25.3                        |
| 19          | 32.4      | 26.8                                              | 27.4                        | 28.9                        | 28.7                        |
| 20          | 73.2      | 71.4                                              | 71.8                        | 80.1                        | 71.6                        |
| 22          | 164.9     | 159.4                                             | 162.4                       | 162.6                       | 163.5                       |
| 23          | 20.6      | 13.4                                              | 18.0                        | 21.6                        | 19.6                        |

**Table S4.** Experimental chemical shifts, and chemical shifts predicted for all of the suspected stereoisomers. Predicted shifts were scaled using the scaling constants in Table S3,  $\delta_{\text{scaled}} = a + b \cdot \delta_{\text{calcd}}$ . The assignments for the C18 and C19 NMR peaks were exchanged.  $\Delta\delta$  values derived from this table are plotted in Figure 3 in the main text.

Glabramycin B

| Configuration               | <i>a</i> | <i>b</i> | <i>r</i> <sup>2</sup> |
|-----------------------------|----------|----------|-----------------------|
| (11 <i>R</i> ,20 <i>R</i> ) | -3.30180 | 1.03367  | 0.99282               |
| (11 <i>R</i> ,20 <i>S</i> ) | -1.92713 | 1.02606  | 0.99396               |
| (11 <i>S</i> ,20 <i>R</i> ) | -0.73100 | 1.02416  | 0.99331               |
| (11 <i>S</i> ,20 <i>S</i> ) | -1.58349 | 1.02256  | 0.99651               |

**Table S5.** Scaling constants *a* and *b* determined by least-squares linear regression between the calculated chemical shifts  $\delta_{\text{calcd}}$  and the experimental ones  $\delta_{\text{exp}}$ , and correlation coefficient *r*<sup>2</sup>. The carboxylate C1 atom was excluded from the linear regression calculation. The NMR peak assignments were unchanged from the original report.

| Carbon Atom | Exp Shift | Predicted Chemical shift $\delta_{\text{scaled}}$ |                             |                             |                             |
|-------------|-----------|---------------------------------------------------|-----------------------------|-----------------------------|-----------------------------|
|             |           | (11 <i>R</i> ,20 <i>R</i> )                       | (11 <i>R</i> ,20 <i>S</i> ) | (11 <i>S</i> ,20 <i>R</i> ) | (11 <i>S</i> ,20 <i>S</i> ) |
| 1           | 170.1     | 165.0                                             | 165.2                       | 166.1                       | 165.0                       |
| 2           | 124.5     | 120.0                                             | 120.4                       | 120.5                       | 120.6                       |
| 3           | 145.2     | 146.8                                             | 147.1                       | 148.1                       | 146.9                       |
| 4           | 136.2     | 135.2                                             | 135.3                       | 134.9                       | 135.6                       |
| 5           | 140.3     | 142.2                                             | 142.2                       | 143.3                       | 142.3                       |
| 6           | 137.3     | 136.9                                             | 136.3                       | 135.4                       | 137.9                       |
| 7           | 123.3     | 125.2                                             | 124.1                       | 125.0                       | 125.3                       |
| 8           | 164.5     | 167.8                                             | 166.2                       | 156.4                       | 165.9                       |
| 9           | 110.9     | 114.3                                             | 115.1                       | 117.3                       | 111.2                       |
| 10          | 49.4      | 54.4                                              | 51.2                        | 52.3                        | 48.6                        |
| 11          | 82.0      | 84.3                                              | 86.1                        | 83.5                        | 82.6                        |
| 12          | 35.9      | 26.4                                              | 28.3                        | 26.3                        | 25.9                        |
| 13          | 26.0      | 37.5                                              | 38.6                        | 36.2                        | 34.9                        |
| 14          | 213.3     | 211.6                                             | 212.1                       | 213.8                       | 213.7                       |
| 15          | 50.6      | 57.9                                              | 58.1                        | 55.4                        | 52.6                        |
| 16          | 23.7      | 22.6                                              | 23.3                        | 20.9                        | 23.3                        |
| 17          | 25.2      | 29.0                                              | 22.4                        | 29.8                        | 25.8                        |
| 18          | 24.9      | 21.6                                              | 22.6                        | 23.5                        | 27.1                        |
| 19          | 32.9      | 27.7                                              | 28.7                        | 25.7                        | 30.5                        |
| 20          | 74.1      | 72.0                                              | 70.9                        | 76.4                        | 73.0                        |
| 22          | 170.1     | 162.0                                             | 163.6                       | 167.6                       | 165.4                       |
| 23          | 20.3      | 15.2                                              | 17.9                        | 18.3                        | 21.4                        |

**Table S6.** Experimental chemical shifts, and chemical shifts predicted for all of the suspected stereoisomers. Predicted shifts were scaled using the scaling constants in Table S5,  $\delta_{\text{scaled}} = a + b \cdot \delta_{\text{calcd}}$ . The NMR peak assignments were unchanged from the original report.<sup>2</sup>

Glabramycin B, with reassignments of C12 and C13

| Configuration               | <i>a</i> | <i>b</i> | <i>r</i> <sup>2</sup> |
|-----------------------------|----------|----------|-----------------------|
| (11 <i>R</i> ,20 <i>R</i> ) | -3.44801 | 1.03527  | 0.99591               |
| (11 <i>R</i> ,20 <i>S</i> ) | -2.06047 | 1.02753  | 0.99681               |
| (11 <i>S</i> ,20 <i>R</i> ) | -0.85830 | 1.02558  | 0.99607               |
| (11 <i>S</i> ,20 <i>S</i> ) | -1.69922 | 1.02383  | 0.99900               |

**Table S7.** Scaling constants *a* and *b* determined by least-squares linear regression between the calculated chemical shifts  $\delta_{\text{calcd}}$  and the experimental ones  $\delta_{\text{exp}}$ , and correlation coefficient *r*<sup>2</sup>. The carboxylate C1 atom was excluded from the linear regression calculation. The assignments for the C12 and C13 NMR peaks were exchanged.

| Carbon Atom | Exp Shift | Predicted Chemical shift $\delta_{\text{scaled}}$ |                             |                             |                             |
|-------------|-----------|---------------------------------------------------|-----------------------------|-----------------------------|-----------------------------|
|             |           | (11 <i>R</i> ,20 <i>R</i> )                       | (11 <i>R</i> ,20 <i>S</i> ) | (11 <i>S</i> ,20 <i>R</i> ) | (11 <i>S</i> ,20 <i>S</i> ) |
| 1           | 170.1     | 165.2                                             | 165.3                       | 166.2                       | 165.1                       |
| 2           | 124.5     | 120.1                                             | 120.4                       | 120.6                       | 120.6                       |
| 3           | 145.2     | 146.9                                             | 147.1                       | 148.2                       | 147.0                       |
| 4           | 136.2     | 135.2                                             | 135.4                       | 135.0                       | 135.7                       |
| 5           | 140.3     | 142.3                                             | 142.3                       | 143.3                       | 142.4                       |
| 6           | 137.3     | 137.0                                             | 136.4                       | 135.5                       | 138.0                       |
| 7           | 123.3     | 125.3                                             | 124.2                       | 125.0                       | 125.3                       |
| 8           | 164.5     | 167.9                                             | 166.4                       | 156.5                       | 166.0                       |
| 9           | 110.9     | 114.3                                             | 115.2                       | 117.4                       | 111.3                       |
| 10          | 49.4      | 54.4                                              | 51.1                        | 52.2                        | 48.5                        |
| 11          | 82.0      | 84.3                                              | 86.1                        | 83.5                        | 82.6                        |
| 12          | 26.0      | 26.3                                              | 28.2                        | 26.2                        | 25.8                        |
| 13          | 35.9      | 37.4                                              | 38.5                        | 36.1                        | 34.8                        |
| 14          | 213.3     | 211.8                                             | 212.3                       | 214.0                       | 213.9                       |
| 15          | 50.6      | 57.8                                              | 58.1                        | 55.3                        | 52.6                        |
| 16          | 23.7      | 22.5                                              | 23.2                        | 20.8                        | 23.3                        |
| 17          | 25.2      | 28.9                                              | 22.3                        | 29.7                        | 25.7                        |
| 18          | 24.9      | 21.5                                              | 22.5                        | 23.4                        | 27.0                        |
| 19          | 32.9      | 27.6                                              | 28.7                        | 25.6                        | 30.4                        |
| 20          | 74.1      | 72.0                                              | 70.8                        | 76.4                        | 73.0                        |
| 22          | 170.1     | 162.1                                             | 163.7                       | 167.7                       | 165.5                       |
| 23          | 20.3      | 15.0                                              | 17.8                        | 18.2                        | 21.4                        |

**Table S8.** Experimental chemical shifts, and chemical shifts predicted for all of the suspected stereoisomers. Predicted shifts were scaled using the scaling constants in Table S7,  $\delta_{\text{scaled}} = a + b \cdot \delta_{\text{calcd}}$ . The assignments for the C12 and C13 NMR peaks were exchanged.  $\Delta\delta$  values derived from this table are plotted in Figure 4 in the main text.

### C. Sample Gaussian input file for the calculation of coupling constants

The following is a template Gaussian input file used the calculation of proton-proton coupling constants. The core basis functions for hydrogen atoms are augmented and decontracted, while unmodified 6-31G(d,p) basis set is used for carbon and oxygen atoms. The Gaussian program is instructed to calculate the Fermi contact term only for spin-spin coupling constants, and calculate the coupling constants for hydrogen atoms only. The file was constructed from the work of Bally and Rablen.<sup>3</sup>

```
%nprocshared=4
%chk=path_to_checkfile.chk
# nmr=(giao,fconly,readatoms) b3lyp/gen geom=connectivity int=nobasistransform

Title: coupling constant calculation

0 1
  atom coordinates section

  atom connectivity section

C 0
6-31G(d,p)
****
O 0
6-31G(d,p)
****
H 0
S 1 1.00      0.000000000000
0.1873113696D+02  0.1000000000D+01
S 1 1.00      0.000000000000
0.2825394365D+01  0.1000000000D+01
S 1 1.00      0.000000000000
0.6401216923D+00  0.1000000000D+01
S 1 1.00      0.000000000000
0.1612777588D+00  0.1000000000D+01
S 1 1.00      0.000000000000
0.5619341088D+02  0.1000000000D+01
S 1 1.00      0.000000000000
0.1685802326D+03  0.1000000000D+01
S 1 1.00      0.000000000000
0.5057406979D+03  0.1000000000D+01
S 1 1.00      0.000000000000
0.1517222094D+04  0.1000000000D+01
P 1 1.00      0.000000000000
0.1100000000D+01  0.1000000000D+01
****

atoms=H
```

---

<sup>3</sup> T. Bally and P. R. Rablen, *J. Org. Chem.*, 2011, **76**, 4818-4830.
